1 **The conspicuousness of the toxic *Heliconius* butterflies across time and**  
2 **habitat**

3

4 Denise Dalbosco Dell’Aglia<sup>1,2\*</sup>

5 Jolyon Troscianko<sup>3</sup>

6 Martin Stevens<sup>3</sup>

7 W Owen McMillan<sup>2</sup>

8 Chris D Jiggins<sup>1</sup>

9

10 **Affiliations**

11 1. Butterfly Genetics Group, Department of Zoology, University of Cambridge,  
12 Cambridge, United Kingdom

13 2. Smithsonian Tropical Research Institute, Panama City, Panama

14 3. Centre for Ecology and Conservation, College of Life and Environmental Sciences,  
15 University of Exeter, Penryn, United Kingdom

16

17 **\* Corresponding author**

18 E-mail: denise.ddd3@gmail.com

19

20 **Key words**

21 aposematism; light environment; avian vision; butterfly vision; colour signal

22 **Abstract**

23 Forests are a mosaic of light spectra, and colour signal efficiency might change in  
24 different light environments. Local adaptation in *Heliconius* butterflies is linked to  
25 microhabitat use and the colourful wing colour patterns may also be adapted for signalling  
26 in different light environments. These butterflies exhibit conspicuous colours as a  
27 warning to predators that they are toxic and should be avoided, but also find and choose  
28 potential mates based on colour signals. The two selection pressures of predation and  
29 mate preference are therefore acting together. In this study we analysed the contrast of  
30 two *Heliconius* mimicry rings in their natural habitats under varying degrees of forest  
31 fragmentation and light conditions. We used digital image analyses and mapped the bird  
32 and butterfly vision colour space in order to examine whether warning colours have  
33 greater contrast and if they transmit a consistent signal across time of the day and habitat  
34 in a tropical forest. We tested conspicuousness using opponent colour channels against a  
35 natural green background. For avian vision, colours are generally very stable through time  
36 and habitat. For butterfly vision, there is some evidence that species are more contrasting  
37 in their own habitats, where conspicuousness is higher for red and yellow bands in the  
38 border and for white in the forest. Light environment affects *Heliconius* butterflies'  
39 warning signal transmission to a higher degree through their own vision, but to a lesser  
40 degree through avian predator vision. This work provides insight into the use of colour  
41 signals in sexual and natural selection in the light of ecological adaptation.

42

43

44

45

46

47

48

49

50

51

## 52 **Introduction**

53           The success of a signal is related to its effectiveness in a specific environment and  
54 how strongly it influences the behaviour of the receiver (Endler 1978). Forests are a  
55 mosaic of light colours, and the same colour pattern can have an altered appearance in  
56 different light environments (Endler 1993). If an individual shows high reflectance of a  
57 specific wavelength, but the environment lacks light in that part of the spectrum, the  
58 region of high reflection will be unimportant as a signal (Stevens et al. 2007). Ambient  
59 light spectra also vary from dawn to dusk, hence species that signal only at certain times  
60 and places are expected to evolve characteristics and predictable combinations of colours  
61 for particular environments (Endler 1993). Therefore, ambient light characteristics should  
62 be included together with the receiver visual system to understand the microhabitat choice  
63 and behaviour of animals.

64           Signals depend on the habitat where animals live in, since light conditions can  
65 alter colour perception by filtering wavelengths and altering visual backgrounds (Endler  
66 1993; Lovell et al. 2005). Sensory drive explains the process of adaptation of signalling  
67 and sensory systems to the local environment (Endler 1992; Endler and Basolo 1998).  
68 Environment tuned spectral sensitivity is better known in aquatic habitats, such as in  
69 guppies (Endler 1980) and cichlid fish (Seehausen et al. 2008), as compared to terrestrial  
70 light environments. On land, colour depends on the reflection of the surroundings and has  
71 greater variability over time (Boughman 2002). Habitat signal transmission can favour  
72 diversification of mating signals through local adaptation, leading to reproductive  
73 isolation. Distinct *Anolis* lizards male dewlaps are found in different microhabitats  
74 (Fleishman et al. 1997). Male dewlap colours are more conspicuous in their own habitat  
75 than in other habitats, mainly because of the contrast against the background in the  
76 ultraviolet (UV) range (Leal and Fleishman 2002). Perception of colours in different light

77 conditions can also influence attacks by predators, for example among butterflies in an  
78 environment with high UV light, birds aimed at the butterfly wings, more specifically the  
79 marginal white eyespots that have UV reflectance, instead of the head (Olofsson et al.  
80 2010).

81 Local adaptation in *Heliconius* butterflies commonly involves adaptation to  
82 specific microhabitat use (Estrada and Jiggins 2002; Elias et al. 2008; Jiggins 2008).  
83 Mimicry rings are groups of unpalatable species that share the same warning colour, and  
84 these tend to be found in different microhabitats such as forest or open areas. The  
85 *Heliconius* habitats are associated with the use of larval host-plants, adult food plants,  
86 sexual behaviour and gregarious roosting (Mallet and Gilbert 1995). Species that lay eggs  
87 on *Passiflora* species that occur in second growth tend to be seen in open areas, while  
88 species that lay eggs on canopy *Passiflora* vines are seen flying high in the forest. The  
89 choice of microhabitat also might be connected with light differences between those  
90 environments, such as the choice of using shady areas in communal roosting (Mallet and  
91 Gilbert 1995; Finkbeiner 2014).

92 Therefore, different light environments should create microhabitats where  
93 butterfly signals would be more efficient. Although mimicry rings differ in their  
94 microhabitat, the light environment has not been measured to verify whether colour  
95 patterns could be specifically adapted to particular light environments. The colourful  
96 wing colours of *Heliconius* butterflies may also be subject to evolution caused by sensory  
97 drive due to their potentially conflicting roles in predation and mate preference. Many  
98 species exhibit Müllerian mimicry (Müller 1879), in which two or more species share the  
99 same conspicuous colour as a warning to predators that they are toxic and should be  
100 avoided (Benson 1972). Also, these butterflies find and choose potential mates based on  
101 colour signals, which can lead to reproductive isolation (Jiggins et al. 2001; Sweeney et

102 al. 2003; Kronforst et al. 2006). Furthermore, communication between conspecifics might  
103 be based on UV signals, since *H. erato* females express the duplicate UV opsin gene,  
104 which allows a greater degree of discrimination of the UV-yellow wing patches (Briscoe  
105 et al. 2010; Bybee et al. 2012; McCulloch et al. 2016; Dell’Aglia et al. 2018).

106 This microhabitat structuring allows mimicry rings to remain distinct. This may  
107 be because there are sets of predators in different habitats, each of which perceive a  
108 different mimicry ring as the most abundant pattern (Joron and Mallet 1998). Although  
109 little is known of the specific predators that attack *Heliconius*, it seems likely that their  
110 aposematic signals are directed at several predators with different visual abilities and  
111 spectral sensitivities (Dell’Aglia et al. 2018). Ambient light together with predator  
112 sensitivity can interfere with the interpretation of the information perceived from colour  
113 signals.

114 Warning coloration should, therefore, be easy to detect and memorize even in  
115 heterogeneous environments and light conditions (Guilford and Dawkins 1991; Endler  
116 1992). Warning signals are often dominated by red, yellow and orange, frequently  
117 contrasting with black, which are the main colours in *Heliconius*. The reason why these  
118 long-wavelength colours are widely represented in aposematic coloration is that they are  
119 highly conspicuous against natural backgrounds, are more stable across light conditions,  
120 allowing long distance discrimination and detectability, and influence memorability  
121 (Guilford and Dawkins 1991; Stevens and Ruxton 2012; Arenas et al. 2014; Dell’Aglia  
122 et al. 2016).

123 Perception of colour depends on several neurophysiological mechanisms, such as  
124 the presence of opponent colour channels. This chromatic mechanism involves  
125 comparisons of receptors outputs, in which opposite neural pathways are either activated  
126 or inhibited depending on the stimuli reaching the eye (Kelber et al. 2003; Renoult et al.

127 2015). This mechanism is useful especially regarding colour stability against spatial and  
128 temporal variation in illumination (Lovell et al. 2005; Renoult et al. 2015). For example  
129 birds, the major predator of aposematic butterflies, have tetrachromatic vision and  
130 seemingly have at least three opponent channels, as found in domestic chicks (Vorobyev  
131 et al. 1998; Osorio et al. 1999). Opponent channels have also been described for insects  
132 (Chittka et al. 1992; Chittka 1996) and butterflies (Kelber 1999), and have been  
133 hypothesized for *Heliconius* butterflies although more behavioural analyses are needed  
134 to confirm which opponent channels are actually used (Swihart 1971, 1972; Bybee et al.  
135 2012). Butterflies in the genus *Papilio* have duplicate LW opsin genes to see in the red  
136 and green range (Kelber 1999; Briscoe 2008), while *Heliconius* has only one LW opsin  
137 to see red and green, and differences in sensitivity are associated with the presence of red  
138 filtering pigments in the ommatidia (Zaccardi et al. 2006; McCulloch et al. 2016). Thus,  
139 we expect avian predators and butterflies to rely on these high-contrast systems to process  
140 information under a changing light environment.

141 The aim of this study was to analyse *Heliconius* warning colouration under  
142 different light conditions in their natural habitats. In particular, to test conspicuousness of  
143 the wing colouration against a natural green background, encoded by opponent colour  
144 channels. Using digital image analyses, butterfly wings were photographed and mapped  
145 to UVS and VS avian predator vision and to *Heliconius erato* vision (Figure 1). Our  
146 predictions are that (1) signal contrast and conspicuousness for avian predators should  
147 have constancy, that should be stable throughout the day and in different light  
148 environments (Stevens and Ruxton 2012; Arenas et al. 2014). Warning signals might be  
149 honest indicators of prey unprofitability to predators, and if signals fluctuate through the  
150 day and between light environments, we would predict that this could delay learning by  
151 predators and be costly to the prey. Similarly for internal contrasts (i.e. contrast between

152 black and the coloured bands), therefore conspicuousness would not rely totally on  
153 background contrast but also on internal patterns which account for close-distance  
154 conspicuousness (Endler 1978; Aronsson and Gamberale-Stille 2009). (2) From a  
155 *Heliconius* butterfly perspective; we predict that signal contrast and conspicuousness  
156 should show habitat-specific maximum background contrast and higher colour  
157 differences in their own habitats (Table 1), which would facilitate detection and species  
158 identification. We therefore predict that selection for signal constancy will be much  
159 stronger in the avian visual system as compared to the butterfly visual system.

160

161

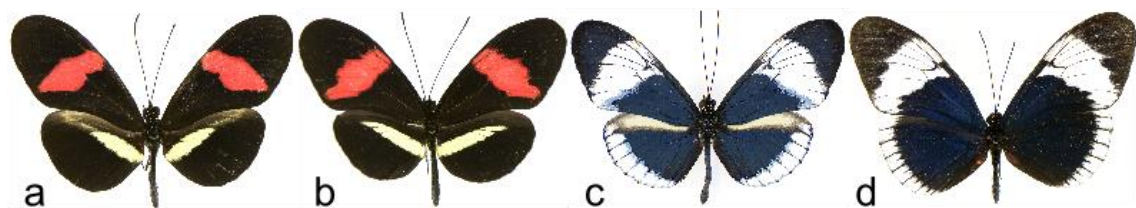

162

163 **Figure 1.** Co-mimics used in this study. (a) *Heliconius erato demophoon*. (b) *H. melpomene*  
164 *rosina*. (c) *H. cydno*. (d) *H. sapho*.

165

166

167 **Table 1.** Colour patches for each co-mimic pair studied and typical microhabitats and light  
168 conditions where these co-mimics occur. Microhabitats descriptions are based on Estrada and  
169 Jiggins (2002) and light conditions based on Endler (1993) and personal observations.

| Co-mimics                                                 | Colour       | Microhabitat               | Light conditions            |
|-----------------------------------------------------------|--------------|----------------------------|-----------------------------|
| <i>H. erato demophoon</i> &<br><i>H. melpomene rosina</i> | red & yellow | forest border<br>open area | partial shade<br>no shade   |
| <i>H. sapho</i> & <i>H. cydno</i>                         | white        | closed forest<br>canopy    | full shade<br>partial shade |

170

171

172

173

## 174 **Material and Methods**

### 175 *Study site and species*

176 Fieldwork was performed during the dry season, along Pipeline Road, a tropical  
177 lowland rainforest in the Panama Canal Zone (Parque Nacional Soberanía, 9°7'33"N,  
178 79°42'90"W). Pipeline Road makes a transect through the forest, creating a  
179 heterogeneous habitat with open sunny areas and close canopy exceeding 30 m in height.  
180 All specimens were collected in the area. Two pairs of co-mimics that live in sympatry  
181 were selected, *H. erato demophoon* (n = 8) and *H. melpomene rosina* (n = 8), *H. sapho*  
182 (n = 5) and *H. cydno* (n = 5), belonging to two different mimicry rings, red and yellow,  
183 and white, respectively (Figure 1 and Table 1).

184

### 185 *Digital photography*

186 The general approach and methodology for this work was based on previous work  
187 with colour stability using opponent signals (Lovell et al. 2005; Arenas et al. 2014). The  
188 spectral reflectance of mimetic pairs was investigated using digital photography. This  
189 provides a way to control for natural variation in luminance intensity (shadowing) that is  
190 not captured by spectrometry, and also allows non-invasive colour measurements easily  
191 applied in the field (Stevens et al. 2007; Troscianko and Stevens 2015). Therefore,  
192 through this method we could obtain colour measures under the sensitivity of all receiver  
193 photoreceptors (300-700 nm) in the actual viewing conditions of conspecifics and avian  
194 predators.

195 Fresh wings of each specimen were photographed following the same methods of  
196 image collection in Dell'Aglio et al. (2018). The camera was fitted to a tripod and pointed  
197 towards the ground (90°) at a height of approximately 80 cm. Each photo setup included  
198 two individuals, one of each species of the co-mimic pair, a 40% grey standard



199 (Spectralon® Labsphere) used for calibration and a leaf freshly collected to make  
200 background measures. The species used was *Guazuma ulmifolia* (Sterculiaceae), a small  
201 abundant shrub across all Pipeline Road, which facilitated the collection of fresh leaves.

202         Photos were taken under three different arboreal canopy conditions, forest border,  
203 closed forest, and open area, where those butterflies are usually seen (Table 1). All photos  
204 were taken under sunny to part-cloudy days, with three replicates in each habitat making  
205 sure that the amount of light was similar. In order to standardize the replicates, light  
206 measures were taken with a digital light meter (Digital Lux meter, Tondaj LX-1010B),  
207 which measures the total amount of LW (555 nm) per square meter (Lux) (Figure 2). Also  
208 photographs of the canopy were taken in order to measure vegetative cover, which was  
209 81.5% (SE ± 0.2) for closed forest, 59.8 % (SE ± 3.4) for forest border, and 0% for open  
210 area. The aim was to analyze how colour signals are perceived throughout the morning  
211 when butterflies are most active. Therefore, photos were taken at dawn (7 am), morning  
212 (9 am) and noon (12 pm) during a short period of 15min as light conditions change  
213 rapidly. Open area photographs were taken only at 12 pm because of high sunlight  
214 incidence (Figure 2) and to represent a highly used environment by butterflies at this  
215 period of day.

216

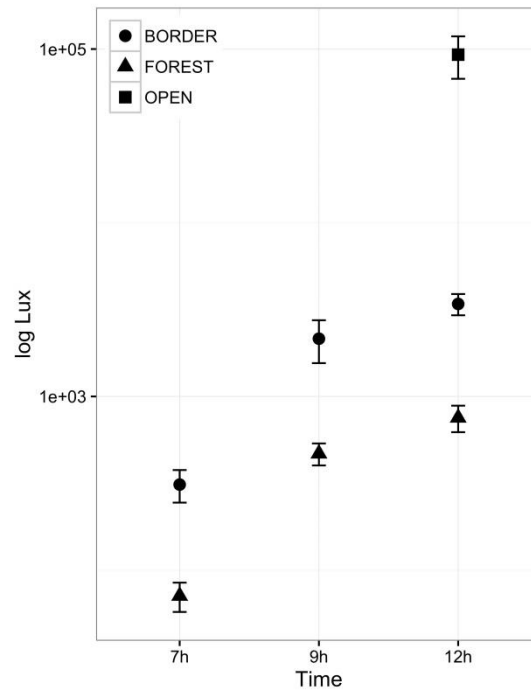

217  
218 **Figure 2.** Amount of light differs across light environment and time of day. Showing the average  
219 log Lux between the three replicates of each habitat ( $\pm$  SE). Lux represents the amount of long-  
220 wave (555 nm) per square meter.

221

222

### 223 *Image analysis and visual modelling*

224 All images were processed and analyzed into the imaging software ImageJ  
225 (Rasband, 1997-2012). RAW human-visible and UV images were linearized and aligned  
226 following the methodology of Troscianko and Stevens (2015) and Arenas et al. (2014).  
227 Normally, photos would be normalized to the grey standard, which removes effects of  
228 light conditions (Arenas et al. 2014). Since our main interest was to measure how  
229 coloration changes in different light environments, the images were not normalized.  
230 Instead, an average grey standard value was obtained from all photographs. Photon catch  
231 values were obtained for each colour using the entire patch from linearized photos, and  
232 subsequently these values were multiplied by each photo exposure time and normalized  
233 with the average grey standard. With this methodology we were able to calculate how  
234 particular environment and time varies from the natural average light, and also assume

235 colour constancy, a neural mechanism that compensates for changes in illumination  
236 (Stevens et al. 2007; Arenas et al. 2014). We used the average photon catch results from  
237 the three habitats replicates. Predicted photon catch values were obtained using spectral  
238 sensitivity for each cone type of the blue tit (*Cyanistes caeruleus*) for the UV-sensitive  
239 vision (UVS) (Hart et al. 2000), peafowl (*Pavo cristatus*) for the violet-sensitive vision  
240 (VS) (Hart 2002) and *Heliconius erato* (Briscoe et al. 2010; McCulloch et al. 2016).

241 Background of many terrestrial habitats is dominated by greenish vegetation;  
242 therefore, a green leaf was chosen to make contrast calculations. Differences between  
243 light environment and time of the day were calculated using the contrast of warning  
244 colours against an average green leaf. Channel activation in avian vision was calculated  
245 using the Red-Green (RG), Blue-Yellow (BY) and Blue-UV opponent channel (Osorio et  
246 al. 1999; Lovell et al. 2005; Stevens et al. 2009). For the achromatic signal, we used avian  
247 double cones (DBL). Using a ratio-based approach suggested by Lovell et al. (2005), we  
248 calculated the opponent channel responses as follows:

$$249 \quad RG = LW - MW / LW + MW$$

$$250 \quad BY = SW - (LW + MW) / SW + (LW + MW)$$

$$251 \quad \text{Blue-UV} = SW - UV / SW + UV$$

$$252 \quad \text{Achromatic} = DBL$$

253 Opponent channels for *Heliconius* were based on existing bird opponent channels  
254 and on what has been proposed in earlier studies (Swihart 1971, 1972; Bybee et al. 2012).  
255 The *H. erato* compound eye has red filtering pigments that shift LW photoreceptor  
256 sensitivity from green to red and as the physiological mechanisms underlying these two  
257 LW photoreceptors are not known, sensitivities in Green (560 nm) and Red (600 nm)  
258 were used (McCulloch et al. 2016, 2017). To investigate differences between co-mimic

259 species, we calculated opponent channel activation based on the prediction that  
260 *Heliconius* mating system might use UV2-UV1 and RG contrasts for mate choice (Bybee  
261 et al. 2012; McCulloch et al. 2016, 2017). Channel activation in *Heliconius* vision was  
262 calculated using the opponent channels as follows:

$$263 \quad RG = Red - Green / Red + Green$$

$$264 \quad BY = Blue - (Red + Green) / Blue + (Red + Green)$$

$$265 \quad Blue-UV2 = Blue - UV2 / Blue + UV2$$

$$266 \quad UV2-UV1 = UV2 - UV1 / UV2 + UV1$$

267 To examine whether warning colours have greater contrast against green  
268 background we calculated the Weber Contrast (Whittle 1994), which takes into account  
269 the image value of the objects of interest as a fraction of background appearance using  
270 the formula:

$$271 \quad C = (object - background) / background$$

272 Where *background* corresponds to the green leaf opponent channel values, and  
273 *object* corresponds to warning colour opponent channel values. This measure is suited to  
274 comparisons between small objects against larger backgrounds, such as butterflies against  
275 the green forest. For internal contrast, achromatic values of the warning colours were used  
276 against the black of each individual wing as background (Arenas et al. 2014). We plotted  
277 the mean absolute contrast of each colour signal as a function of time and light  
278 environment for the three vision models.

279

## 280 *Statistical analyses*

281 All statistical calculations were processed in the software R 3.5.3 (R Core Team  
282 2019). Our approach was to model colour contrasts over the course of a day and under  
283 different habitats in term of both predator and butterfly vision. Normality tests showed

284 that contrast data were not normally distributed, therefore data were transformed to  
285 normality using square-root transformation and the transformed data were used in all  
286 statistical analyses. Raw data was plotted to illustrate the results. To test our predictions,  
287 general linear mixed models were performed using Satterthwaite approximations with  
288 random effects (packages *lme4* and *lmerTest*) and Tukey's post-hoc (package *multcomp*).  
289 The models were fitted accordingly to the predictions outlined above. Analyses were  
290 carried out using contrast values as the dependent variable, and fixed and random factors  
291 varied depending on the question. Factors were individuals, colour (red, yellow, white),  
292 habitat (border, forest, area), time (7am, 9am, 12pm), and bird vision (UVS, VS). For  
293 *Heliconius* vision, we also added side of the wing (dorsal, ventral) because this trait might  
294 be more important for butterflies than for their avian predators.

295

## 296 **Results**

### 297 *Signal contrast and conspicuousness for avian predators*

298 Red was generally the most contrasting colour against a green background in the  
299 RG opponent channel as compared to yellow ( $z = -11.10$ ,  $P < 0.001$ , Table S1) and white  
300 ( $z = -18.0$ ,  $P < 0.001$ , Table S1). In contrast, white had higher contrasts against a green  
301 background in the BY channel, as compared to red ( $z = 22.88$ ,  $P < 0.001$ , Table S1) and  
302 yellow ( $z = -31.47$ ,  $P < 0.001$ , Table S1) (Figure 3). Colours in open areas showed a  
303 higher contrast, such in the RG channel for red band ( $t = 7.54$ ,  $P < 0.001$ , Table S2) with  
304 no difference between border and forest ( $z = -0.31$ ,  $P = 0.94$ , Table S2) (Figure 3). In the  
305 Blue-UV opponent channel, UVS and VS birds could perceive red and yellow with less  
306 stability, and yellow showed higher contrast early in the morning than at noon (7 am:  $z =$   
307  $12.15$ ,  $P < 0.001$ ; 9 am:  $z = 14.24$ ,  $P < 0.001$ , Table S3).

308 Internal achromatic contrast was higher for yellow, compared to red ( $z = 41.89$ ,  $P$   
309  $< 0.001$ , Table S1) and white ( $z = 12.42$ ,  $P < 0.001$ , Table S1). Moreover, yellow has  
310 more contrast in the border, which is the preferred habitat of yellow band butterflies, than  
311 in the forest ( $z = -3.42$ ,  $P = 0.001$ , Table S4) (Figure 3).

312

### 313 *Signal contrast and conspicuousness for Heliconius conspecifics*

314 In some cases, contrasts followed our prediction that species would be more  
315 contrasting in their own habitats (Figure 4). The yellow colour was more contrasting in  
316 the border in the UV2-UV1 channel, especially early hours such as 7 am ( $t = -23.1$ ,  $P <$   
317  $0.001$ , Table S5) and 9 am ( $t = -13.3$ ,  $P < 0.001$ , Table S5). White was more contrasting  
318 in the forest than in the border at 7 am in the UV2-UV1 channel ( $t = 2.32$ ,  $P = 0.014$ ,  
319 Table S5) and also at 7 am in the Blue-UV2 channel ( $t = 6.12$ ,  $P < 0.001$ , Table S5). Also,  
320 in the Blue-UV2 channel, while white colour contrast decreased during the day in the  
321 forest, it increased at 12 pm in the border ( $z = -4.11$ ,  $P < 0.001$ , Table S5) (Figure 4). The  
322 red colour showed large differences in the RG channel between dorsal and ventral side,  
323 with dorsal side with the higher contrast ( $t = -40.04$ ,  $P < 0.001$ , Table S6). Same results  
324 were found for red in the Blue-Yellow and Blue-UV2 opponent channel (Table S6)  
325 (Figure 4).

326

327

328

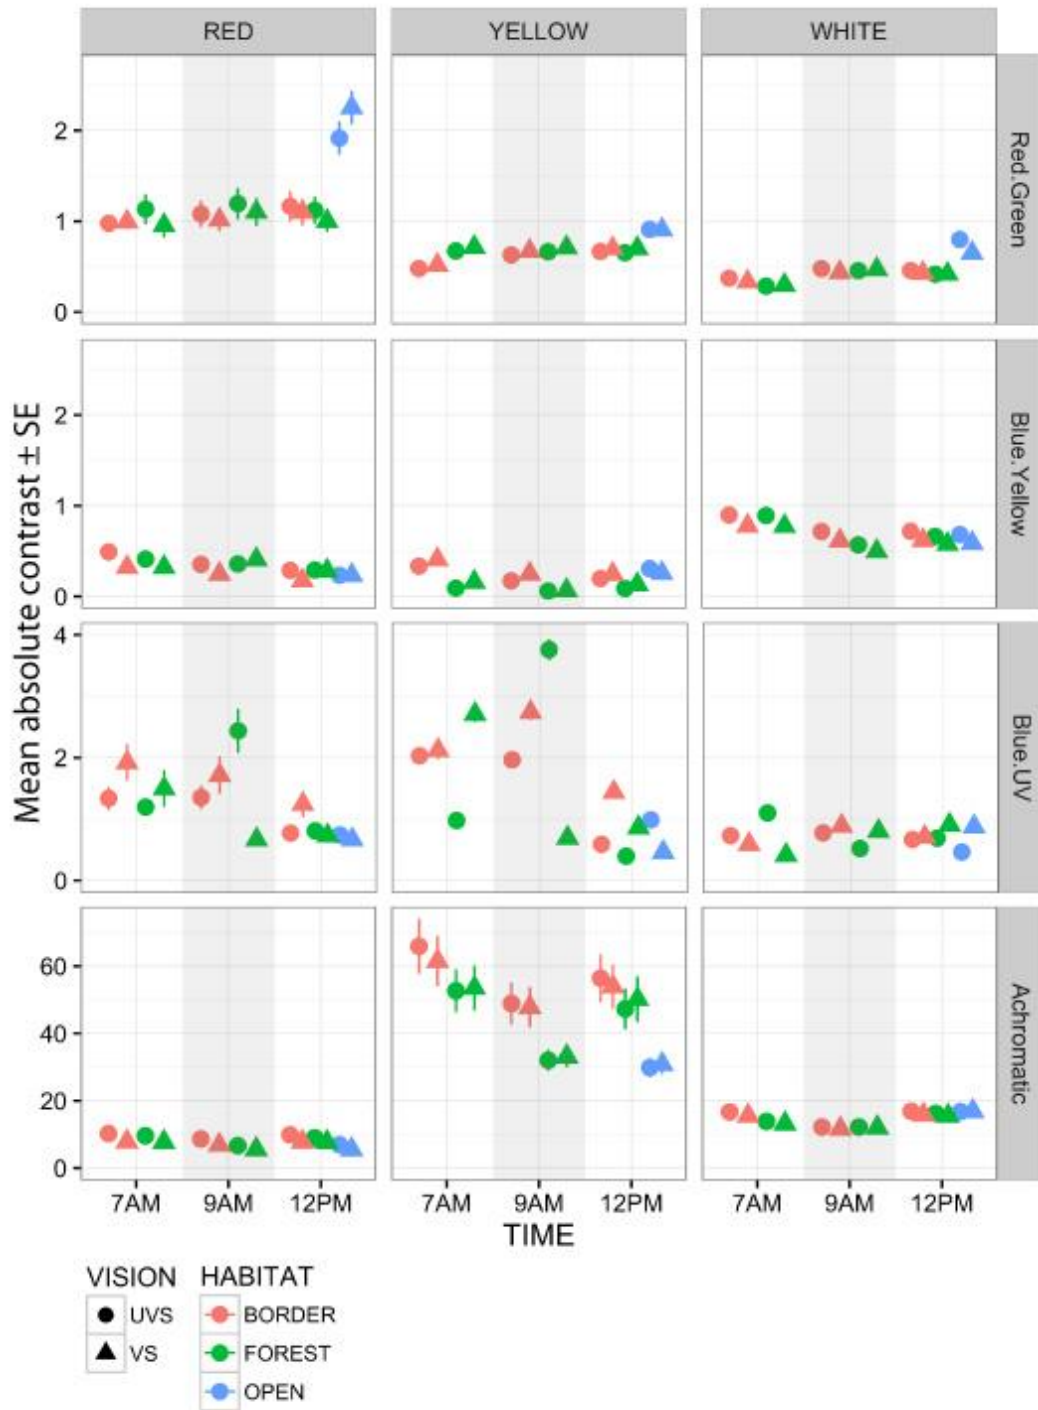

329

330 **Figure 3.** Colour conspicuousness for avian predators. Mean absolute contrast of colour signals  
 331 ( $\pm$ SE, standard error) in the bird vision systems analyzed (circles, UVS; triangles, VS) through  
 332 habitats (red, border; green, forest; blue, open) and time (7am, 9am, 12pm). Vertical panels show  
 333 the three colour signals (red, yellow and white), horizontal panels show opponent channels against  
 334 green leaf (top, Red-Green; middle, Blue-Yellow and Blue-UV) and against the black of the wing  
 335 (bottom, Achromatic). Note: Channels have different y-axis values. Error bars smaller than data  
 336 points are not shown.

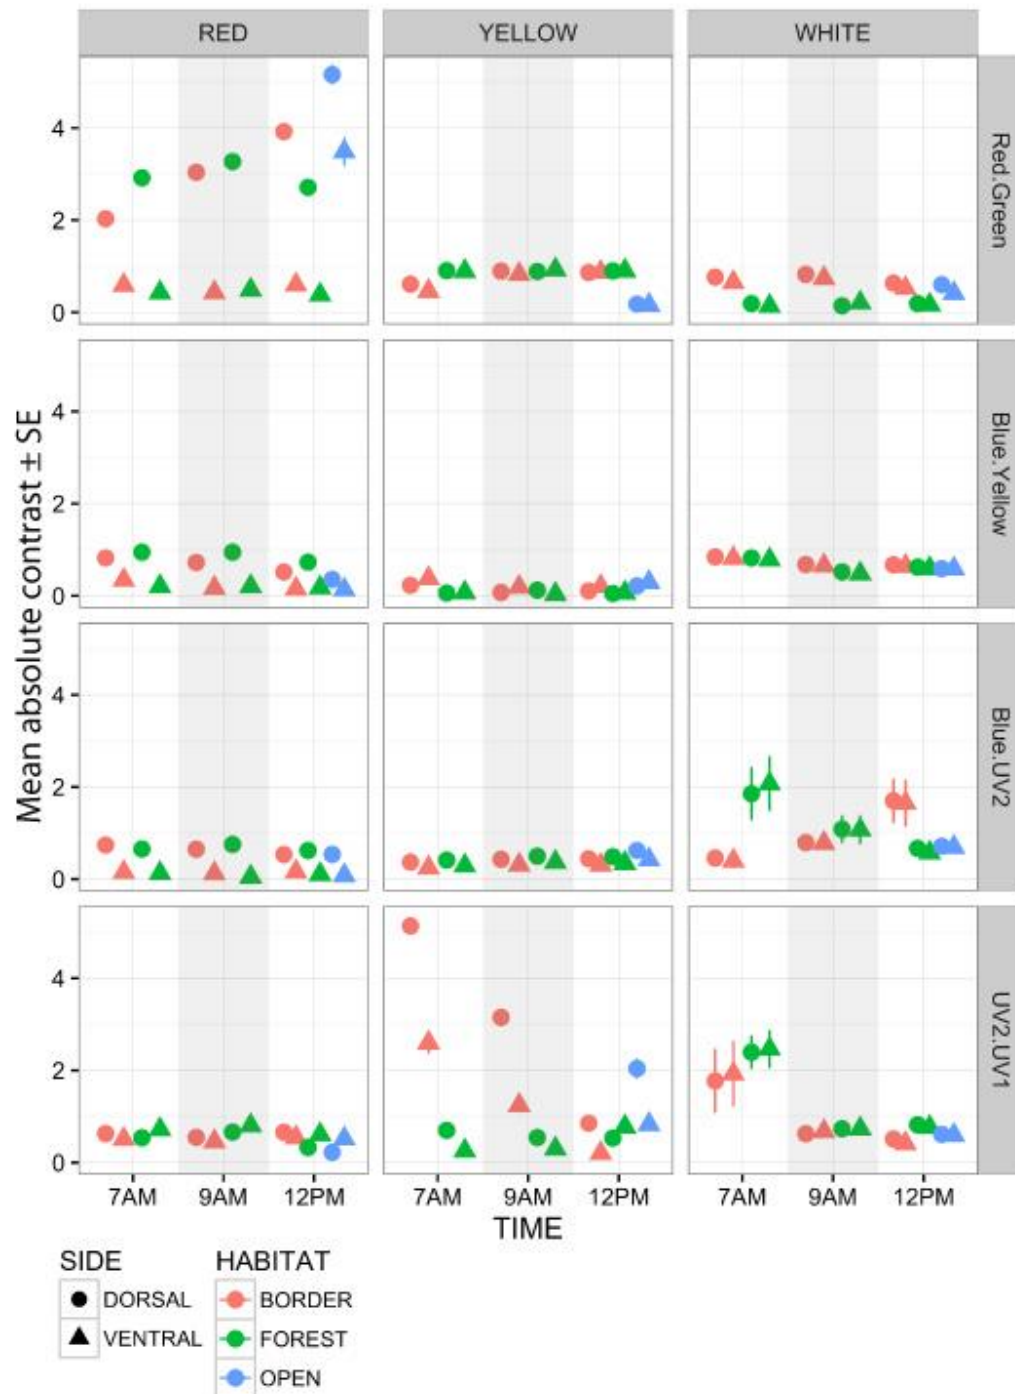

337

338 **Figure 4.** Colour conspicuousness for *Heliconius* conspecifics. Mean absolute contrast of colour  
 339 signals against green leaf in *Heliconius* vision through habitats (red, border; green, forest; blue,  
 340 open), time (7 am, 9 am, 12 pm) and side of the wing (circles, dorsal; triangles, ventral). Vertical  
 341 panels show colour signals (red, yellow and white), horizontal panels show opponent channels  
 342 against green leaf (top, Red-Green; middle, Blue-Yellow and Blue-UV2; bottom, UV2-UV1).  
 343 Error bars:  $\pm$  1 standard error (SE), error bars smaller than data points are not shown.

344

345



346 **Discussion**

347           The bright and contrasting *Heliconius* wing patterns appear well adapted for  
348 signalling distastefulness to predators. However, their colour constancy and appearance  
349 in different light environments remains poorly studied. Here we have shown that colours  
350 are indeed very stable for avian predator vision, but somewhat less so for *Heliconius*  
351 vision. This is consistent with the idea that wing patterns are primarily selected for their  
352 role in signalling distastefulness to predators.

353

354 *Signal stability and conspicuousness to avian predators*

355           Generally, warning signals involve combinations of long-wavelength colours such  
356 as red, orange, and yellow which are highly conspicuous against natural backgrounds and  
357 stable under different natural conditions (Lovell et al. 2005; Stevens and Ruxton 2012).  
358 In our results, *Heliconius* red colouration has higher detectability against average green  
359 background in the RG output and these results are consistent regardless of habitat and  
360 time of the day. Previous work has investigated colour stability through opponent colour  
361 channels and also showed that red coloration is more contrasting and stable against green  
362 backgrounds over the course of a day and across light conditions to the bird visual system  
363 (Lovell et al. 2005; Arenas et al. 2014). Moreover, the *Heliconius* yellow colouration also  
364 is highly conspicuous against its internal black pattern in the achromatic output.  
365 Achromatic information is one of the main cues used for motion detection (Hämäläinen  
366 et al. 2015). Therefore, our results suggest that red and yellow signals work together and  
367 are likely effective in stimulating avian opponent channels in order to be conspicuous in  
368 all light environments.

369           There is evidence that red and yellow colouration serve as reliable warning signal  
370 to avian predators (Ham et al. 2006; Svádová et al. 2009; Arenas et al. 2015), but that this

371 is less true of white colouration. One explanation is that white is more variable across  
372 time and habitat, so provides a less reliable signal under varied light conditions (Stevens  
373 and Ruxton 2012; Arenas et al. 2014). As an example, field and aviary experiments with  
374 polymorphic yellow and white wood tiger moths, *Parasemia plantaginis*, showed that  
375 yellow males are avoided more than white males by predators, but white males have  
376 higher mating success (Nokelainen et al. 2012). Our results showed that white contrasts  
377 against green background were lower and rather variable for avian vision. The co-mimics  
378 *H. sapho* and *H. cydno* also contain iridescence blue that was not measured with this  
379 methodology. However, the lack of high contrast in white colouration might be balanced  
380 with the fact that polarized light might act as a signal, especially in forest habitats  
381 (Sweeney et al. 2003; Douglas et al. 2007; Pegram et al. 2015).

382       Highly conspicuous warning signals are expected to evolve to be stable in their  
383 appearance throughout the day and between light environments, in order to remain honest  
384 indicators of prey unpalatability (Blount et al. 2009; Cortesi and Cheney 2010; Stevens  
385 and Ruxton 2012; Arenas et al. 2015). If warning signals fluctuate through time and space  
386 this could alter bird foraging experiences and reduce the effectiveness of the aposematic  
387 signal. The final decision on whether or not to attack a prey results from a combination  
388 of information reaching the predator brain, and for greater efficiency, aposematic  
389 coloration needs to be easy to remember (Endler 1988). Our results support this  
390 prediction, as colours were generally stable through time and light environments in all  
391 opponent systems with only a few exceptions. Notably these occurred where contrasts  
392 were higher in open areas and in the early morning. This might also be favourable as the  
393 prey would be more conspicuous when they are most vulnerable to predation, since birds  
394 are more active and forage early in the morning (Buskirk et al. 1972; Poulin et al. 2001;

395 Steiger et al. 2009). In agreement with this, *Heliconius* predation and roost disturbance  
396 has been observed in the early morning (Mallet 1986; Finkbeiner 2014).

397

398 *Habitat and time influence conspicuousness in Heliconius conspecifics*

399 Butterflies belonging to the two mimetic rings studied here tend to be segregated  
400 between habitats, corresponding to areas where the photographs were taken, although  
401 there is considerable overlap (Estrada and Jiggins 2002). We showed that the colours  
402 were more unstable when seen through *Heliconius* vision as compared to avian vision and  
403 some colours tend to be more contrasting in their respective habitats.

404 Our results provide some evidence that co-mimic rings are more conspicuous in  
405 their own habitat as seen through *Heliconius* vision, reinforcing the idea that ecological  
406 adaptation leads to spatial segregation to where detection would be facilitated. Some  
407 colours had higher contrast against green backgrounds in their respective habitat, such as  
408 yellow in the border and white in the forest. Nonetheless, red showed the opposite trend  
409 and was generally more contrasting in the forest. Differences across light environments  
410 could affect mating preferences by altering search costs for a specific colour pattern, and  
411 perhaps changing the fitness of different colour patterns. Adaptation in different  
412 microhabitats within the forest might have an influence on how closely related species  
413 commonly differ in pattern, while convergence in pattern occurs between more distantly  
414 related species (Joron and Mallet 1998). Ecological adaptation is attributed to habitat  
415 preference and leads to assortative mating (Jiggins 2008). The two sister species studied  
416 here, *H. melpomene rosina* and *H. cydno*, are known to rarely hybridise in the wild, hence  
417 microhabitat segregation reduces potential mating encounters between these two species  
418 and reduces gene flow (Mallet et al. 1998; Merrill et al. 2013). Subtle environmental  
419 conditions could affect recognition in mating behaviour as seen in the jumping spider,

420 *Habronattus pyrrithrix*, which red males were more successful in approaching females in  
421 the sunlight (Taylor and McGraw 2013).

422 The activation of opponent channels was often higher in the early hours of the  
423 morning, at the time when the butterflies are more active and leave their roost or perches  
424 to forage (Mallet 1986; Finkbeiner et al. 2012). This was especially the case for  
425 *Heliconius* white and yellow wing colours in the UV channel, which might act in  
426 intraspecific communication (Briscoe et al. 2010; Bybee et al. 2012). There is evidence  
427 that distinct UV colour signals are being transmitted between co-mimics, which may  
428 reduce costs of mating confusion (Dell’Aglia et al. 2018). Similarly, in two species of  
429 newt, belly colour is distinct in the UV range and females often made mistakes choosing  
430 the wrong males in the absence of UV light (Secondi and Théry 2014).

431 In this context, the duplicate genes encoding two distinct visual pigments with  
432 sensitivity peaks in the UV range in *H. erato* females offer the potential for enhanced  
433 spectral discrimination in light environments and time of the day where UV is more  
434 prominent. A UV2-UV1 opponent channel was proposed by Bybee et al. (2012), who  
435 showed that this receptor combination would have lower error rates for discrimination  
436 between *Heliconius* and *Dryas* yellows. There is no direct evidence for such a mechanism  
437 yet, but the fact that males and females show differences in the expression of the two UV  
438 proteins suggests that UV2-UV1 contrasts could be an important opponent channel for a  
439 female specific behaviour, perhaps mate recognition or host plant finding (McCulloch et  
440 al. 2016, 2017). There is similarly no direct evidence for a Red-Green opponent channel,  
441 although the presence of red filters in their eyes means that this is a possibility  
442 (McCulloch et al. 2016). Differences between species in Red-Green channel activity for  
443 red colouration might have a role in mate recognition since *Heliconius* tend to be attracted  
444 to red (Merrill et al. 2011).

445           The sensory drive hypothesis describes evolutionary relationships among visual  
446 systems, conditions of the light environment and mating preferences (Endler and Basolo  
447 1998). *Heliconius* mating preference is highly linked to colour and in *H. melpomene*, the  
448 gene responsible for red colour pattern is genetically linked to the preference for the same  
449 pattern (Jiggins et al. 2001; Naisbit et al. 2001; Merrill et al. 2011). Visual sensitivity data  
450 used here is only from *H. erato* whereas it might differ for other species in their visual  
451 systems and perhaps match with colour preference or habitat (Frentiu et al. 2007; Briscoe  
452 et al. 2010; McCulloch et al. 2017). In addition, mating behaviour might benefit from  
453 some habitats in maximizing conspicuousness, such as in tropical dwelling birds and  
454 wire-tailed manakins which visual contrast is increased during display by habitat choice  
455 (Endler and Théry 1996; Heindl and Winkler 2003). Nevertheless, our results suggest that  
456 selection for conspicuousness in the preferred habitat could explain in part the divergence  
457 in colour pattern in these species.

458

#### 459 *Conclusion*

460           In conclusion, the transmission of *Heliconius* warning signals varies due to light  
461 environment to a much greater degree through their own visual system, but to a smaller  
462 degree through avian predator vision. Selection for signal detectability under different  
463 habitat conditions is a mechanism that is proposed to lead to evolution of signal diversity,  
464 as seen in species of *Anolis* lizards that occupy habitats that match their visual system and  
465 signal design (Leal and Fleishman 2002), in species of warblers which different cone  
466 opsin gene expression correlate with sexual selection and habitat use (Bloch 2015) and  
467 also colour patterns of guppies are more conspicuous to guppies at the times and places  
468 of courtship and relatively less conspicuous at times and places of predator risk (Endler  
469 1991). *Heliconius* butterfly warning colours are highly contrasting against the forest

470 background and stable through time and habitat in terms of predator avoidance but also  
471 conspicuous to attract the attention of conspecifics. However, more extensive studies  
472 considering spectral sensitivities of different *Heliconius* species and their responses to  
473 environmental changes in their signal visibility are needed to confirm the  
474 conspicuousness to mates. Opponent channel colour contrasts can predict behaviour of  
475 perceivers, however, additional behavioural experiments on how light environment  
476 influences prey detectability, such with poison frogs (Rojas et al. 2014), are necessary to  
477 verify our results.

478

479

480

481

482

483

#### 484 **Funding**

485 This study was supported by Smithsonian Tropical Research Institute, Cambridge Trust,  
486 and CAPES Brazil (9423/11-7) to D.D.D, by European Research Council (Speciation  
487 Genetics 339873) to C.D.J., and by Biotechnology and Biological Sciences Research  
488 Council David Phillips Research Fellowship (BB/G022887/1) to M.S.

489

#### 490 **Author contributions**

491 D.D.D. collected all the data, analysed, and wrote the manuscript; J.T. developed digital  
492 image methodology and data analysis; W.O.M, M.S, and C.D.J conceived the study,  
493 edited, and wrote the manuscript. We have no conflict of interest to declare.

494

495 **References**

- 496 Arenas, L. M., J. Troscianko, and M. Stevens. 2014. Color contrast and stability as key  
497 elements for effective warning signals. *Front. Ecol. Evol.* 2:1–12.
- 498 Arenas, L. M., D. Walter, and M. Stevens. 2015. Signal honesty and predation risk among  
499 a closely related group of aposematic species. *Sci. Rep.* 5:11021.
- 500 Aronsson, M., and G. Gamberale-Stille. 2009. Importance of internal pattern contrast and  
501 contrast against the background in aposematic signals. *Behav. Ecol.* ar141.
- 502 Benson, W. W. 1972. Natural Selection for Mullerian Mimicry in *Heliconius erato* in  
503 Costa Rica. *Science* 176:936–939.
- 504 Bloch, N. I. 2015. Evolution of opsin expression in birds driven by sexual selection and  
505 habitat. *Proc. R. Soc. B* 282:20142321.
- 506 Blount, J. D., M. P. Speed, G. D. Ruxton, and P. A. Stephens. 2009. Warning displays  
507 may function as honest signals of toxicity. *Proc. R. Soc. Lond. B* 276:871–877.
- 508 Boughman, J. W. 2002. How sensory drive can promote speciation. *Trends Ecol. Evol.*  
509 17:571–577.
- 510 Briscoe, A. D. 2008. Reconstructing the ancestral butterfly eye: focus on the opsins. *J.*  
511 *Exp. Biol.* 211:1805–1813.
- 512 Briscoe, A. D., S. M. Bybee, G. D. Bernard, Y. Furong, M. P. Sison-Mangus, R. D. Reed,  
513 A. D. Warren, J. Llorente-bousquets, and C. Chiao. 2010. Positive selection of a  
514 duplicated UV-sensitive visual pigment coincides with wing pigment evolution in  
515 *Heliconius* butterflies. *PNAS* 107:3628–3633.
- 516 Buskirk, W. H., G. V. N. Powell, J. F. Wittenberger, R. E. Buskirk, and T. U. Powell.  
517 1972. Interspecific Bird Flocks in Tropical Highland Panama. *Am. Ornithol.*  
518 *Union* 89:612–624.
- 519 Bybee, S. M., F. Yuan, M. D. Ramstetter, J. Llorente-Bousquets, R. D. Reed, D. Osorio,  
520 and A. D. Briscoe. 2012. UV Photoreceptors and UV-Yellow Wing Pigments in  
521 *Heliconius* Butterflies Allow a Color Signal to Serve both Mimicry and  
522 Intraspecific Communication. *Am. Soc. Nat.* 179:38–51.
- 523 Chittka, L. 1996. Optimal Sets of Color Receptors and Color Opponent Systems for  
524 Coding of Natural Objects in Insect Vision. *J. Theor. Biol.* 181:179–196.
- 525 Chittka, L., W. Beier, H. Hertel, E. Steinmann, and R. Menzel. 1992. Opponent colour  
526 coding is a universal strategy to evaluate the photoreceptor inputs in  
527 Hymenoptera. *J. Comp. Physiol. A* 170:545–563.

- 528 Cortesi, F., and K. L. Cheney. 2010. Conspicuousness is correlated with toxicity in marine  
529 opisthobranchs. *J. Evol. Biol.* 23:1509–1518.
- 530 Dell’Aglia, D. D., M. Stevens, and C. D. Jiggins. 2016. Avoidance of an aposematically  
531 coloured butterfly by wild birds in a tropical forest. *Ecol. Entomol.*, doi:  
532 10.1111/een.12335.
- 533 Dell’Aglia, D. D., J. Troscianko, W. O. McMillan, M. Stevens, and C. D. Jiggins. 2018.  
534 The appearance of mimetic *Heliconius* butterflies to predators and conspecifics.  
535 *Evolution* 72:2156–2166.
- 536 Douglas, J. M., T. W. Cronin, T. Chiou, and N. J. Dominy. 2007. Light habitats and the  
537 role of polarized iridescence in the sensory ecology of neotropical nymphalid  
538 butterflies (Lepidoptera: Nymphalidae). *J. Exp. Biol.* 210:788–799.
- 539 Elias, M., Z. Gompert, C. D. Jiggins, and K. Willmott. 2008. Mutualistic Interactions  
540 Drive Ecological Niche Convergence in a Diverse Butterfly Community. *PLoS*  
541 *Biol.* 6:e300.
- 542 Endler, J. A. 1978. A predator’s view of animal color patterns. Pp. 319 – 364 *in*  
543 *Evolutionary Biology*.
- 544 Endler, J. A. 1988. Frequency-dependent predation, crypsis and aposematic coloration.  
545 *Philos. Trans. R. Soc. B Biol. Sci.* 319:505–523.
- 546 Endler, J. A. 1980. Natural Selection on Color Patterns in *Poecilia reticulata*. *Evolution*  
547 34:76–91.
- 548 Endler, J. A. 1992. Signals, Signal Conditions, and the Direction of Evolution. *Am. Nat.*  
549 139:S125–S153.
- 550 Endler, J. A. 1993. The color of light in forests and its implications. *Ecol. Monogr.* 63:1–  
551 27.
- 552 Endler, J. A. 1991. Variation in the appearance of guppy color patterns to guppies and  
553 their predators under different visual conditions. *Vision Res.* 31:587–608.
- 554 Endler, J. A., and A. L. Basolo. 1998. Sensory ecology, receiver biases and sexual  
555 selection. *Trends Ecol. Evol.* 13:415–420.
- 556 Endler, J. A., and M. Théry. 1996. Interacting Effects of Lek Placement, Display  
557 Behavior, Ambient Light, and Color Patterns in Three Neotropical Forest-  
558 Dwelling Birds. *Am. Nat.* 148:421–452.
- 559 Estrada, C., and C. D. Jiggins. 2002. Patterns of pollen feeding and habitat preference  
560 among *Heliconius* species. *Ecol. Entomol.* 27:448–456.



- 561 Finkbeiner, S. D. 2014. Communal roosting in heliconius butterflies (nymphalidae): roost  
562 recruitment, establishment, fidelity, and resource use trends based on age and sex.  
563 *J. Lepidopterists Soc.* 68:10–16.
- 564 Finkbeiner, S. D., A. D. Briscoe, and R. D. Reed. 2012. The benefit of being a social  
565 butterfly: communal roosting deters predation. *Proc. R. Soc. B* 279:2769–2776.
- 566 Fleishman, L. J., M. Bowman, D. Saunders, W. E. Miller, M. J. Rury, and E. R. Loew.  
567 1997. The visual ecology of Puerto Rican anoline lizards: Habitat light and  
568 spectral sensitivity. *J. Comp. Physiol. A* 181:446–460.
- 569 Frentiu, F. D., G. D. Bernard, M. P. Sison-Mangus, A. Van Zandt Brower, and A. D.  
570 Briscoe. 2007. Gene duplication is an evolutionary mechanism for expanding  
571 spectral diversity in the long-wavelength photopigments of butterflies. *Mol. Biol.*  
572 *Evol.* 24:2016–2028.
- 573 Guilford, T., and M. S. Dawkins. 1991. Receiver psychology and the evolution of animal  
574 signals. *Anim. Behav.* 42:1–14.
- 575 Ham, A. D., E. Ihalainen, L. Lindström, and J. Mappes. 2006. Does colour matter? The  
576 importance of colour in avoidance learning, memorability and generalisation.  
577 *Behav. Ecol. Sociobiol.* 60:482–491.
- 578 Hämäläinen, L., J. Valkonen, J. Mappes, and B. Rojas. 2015. Visual illusions in predator–  
579 prey interactions: birds find moving patterned prey harder to catch. *Anim. Cogn.*  
580 18:1059–1068.
- 581 Hart, N. S. 2002. Vision in the peafowl (*Aves: Pavo cristatus*). *J. Exp. Biol.* 205:3925–  
582 3935.
- 583 Hart, N. S., J. C. Partridge, I. C. Cuthill, and A. T. D. Bennett. 2000. Visual pigments, oil  
584 droplets, ocular media and cone photoreceptor distribution in two species of  
585 passerine bird: the blue tit (*Parus caeruleus* L.) and the blackbird (*Turdus merula*  
586 L.). *J. Comp. Physiol. A* 186:375–387.
- 587 Heindl, M., and H. Winkler. 2003. Interacting effects of ambient light and plumage color  
588 patterns in displaying wire-tailed manakins (*Aves, Pipridae*). *Behav. Ecol.*  
589 *Sociobiol.* 53:153–162.
- 590 Jiggins, C. D. 2008. Ecological Speciation in Mimetic Butterflies. *BioScience* 58:541–  
591 548.
- 592 Jiggins, C. D., R. E. Naisbit, R. L. Coe, and J. Mallet. 2001. Reproductive isolation caused  
593 by colour pattern mimicry. *Nature* 411:302–305.

- 594 Joron, M., and J. Mallet. 1998. Diversity in mimicry: paradox or paradigm? *Trends Ecol.*  
595 *Evol.* 13:461–466.
- 596 Kelber, A. 1999. Ovipositing butterflies use a red receptor to see green. *J. Exp. Biol.*  
597 202:2619–2630.
- 598 Kelber, A., M. Vorobyev, and D. Osorio. 2003. Animal colour vision – behavioural tests  
599 and physiological concepts. *Biol. Rev.* 78:81–118.
- 600 Kronforst, M. R., L. G. Young, D. D. Kapan, C. McNeely, R. J. O’Neill, and L. E. Gilbert.  
601 2006. Linkage of butterfly mate preference and wing color preference cue at the  
602 genomic location of wingless. *PNAS* 103:6575–6580.
- 603 Leal, M., and L. J. Fleishman. 2002. Evidence for habitat partitioning based on adaptation  
604 to environmental light in a pair of sympatric lizard species. *Proc. R. Soc. Lond. B*  
605 269:351–359.
- 606 Lovell, P. G., D. J. Tolhurst, C. A. Párraga, R. Baddeley, U. Leonards, J. Troscianko, and  
607 T. S. Troscianko. 2005. Stability of the color-opponent signals under changes of  
608 illuminant in natural scenes. *J. Opt. Soc. Am.* 22:2060–2071.
- 609 Mallet, J. 1986. Gregarious roosting and home range in *Heliconius* butterflies. *Natl.*  
610 *Geogr. Res.* 2:198–215.
- 611 Mallet, J., and L. E. Gilbert. 1995. Why are there so many mimicry rings? Correlations  
612 between habitat, behaviour and mimicry in *Heliconius* butterflies. *Biol. J. Linn.*  
613 *Soc.* 55:159–180.
- 614 Mallet, J., W. O. Mcmillan, and C. D. Jiggins. 1998. Estimating the Mating Behavior of  
615 a Pair of Hybridizing *Heliconius* Species in the Wild. *Evolution* 52:503–510.
- 616 McCulloch, K. J., D. Osorio, and A. D. Briscoe. 2016. Sexual dimorphism in the  
617 compound eye of *Heliconius erato*: a nymphalid butterfly with at least five  
618 spectral classes of photoreceptor. *J. Exp. Biol.* 219:2377–2387.
- 619 McCulloch, K. J., F. Yuan, Y. Zhen, M. L. Aardema, G. Smith, J. Llorente-Bousquets, P.  
620 Andolfatto, and A. D. Briscoe. 2017. Sexual Dimorphism and Retinal Mosaic  
621 Diversification following the Evolution of a Violet Receptor in Butterflies. *Mol.*  
622 *Biol. Evol.* 34:2271–2284.
- 623 Merrill, R. M., R. E. Naisbit, J. Mallet, and C. D. Jiggins. 2013. Ecological and genetic  
624 factors influencing the transition between host-use strategies in sympatric  
625 *Heliconius* butterflies. *J. Evol. Biol.* 26:1959–1967.

- 626 Merrill, R. M., B. Van Schooten, J. A. Scott, and C. D. Jiggins. 2011. Pervasive genetic  
627 associations between traits causing reproductive isolation in *Heliconius*  
628 butterflies. *Proc. R. Soc. B* 278:511–518.
- 629 Müller, F. 1879. *Ituna* and *Thyridia*; a remarkable case of mimicry in butterflies. *Trans.*  
630 *Linn. Soc. Lond.* 1879:xx–xxix.
- 631 Naisbit, R. E., C. D. Jiggins, and J. Mallet. 2001. Disruptive sexual selection against  
632 hybrids contributes to speciation between *Heliconius cydno* and *Heliconius*  
633 *melpomene*. *Proc. R. Soc. B* 268:1849–1854.
- 634 Nokelainen, O., R. H. Hegna, J. H. Reudler, C. Lindstedt, and J. Mappes. 2012. Trade-  
635 off between warning signal efficacy and mating success in the wood tiger moth.  
636 *Proc. R. Soc. B* 279:257–265.
- 637 Olofsson, M., A. Vallin, S. Jakobsson, and C. Wiklund. 2010. Marginal Eyespots on  
638 Butterfly Wings Deflect Bird Attacks Under Low Light Intensities with UV  
639 Wavelengths. *PLoS ONE* 5:e10798.
- 640 Osorio, D., M. Vorobyev, and C. D. Jones. 1999. Colour vision of domestic chicks. *J.*  
641 *Exp. Biol.* 202:2951–2959.
- 642 Pegram, K. V., H. A. Han, and R. L. Rutowski. 2015. Warning Signal Efficacy: Assessing  
643 the Effects of Color, Iridescence, and Time of Day in the Field. *Ethology* 121:1–  
644 13.
- 645 Poulin, B., G. Lefebvre, R. Ibáñez, C. Jaramillo, C. Hernández, and A. S. Rand. 2001.  
646 Avian predation upon lizards and frogs in a neotropical forest understorey. *J.*  
647 *Trop. Ecol.* 17:21–40.
- 648 R Core Team. 2019. *R: A Language and Environment for Statistical Computing*. R  
649 Foundation for Statistical Computing, Vienna, Austria.
- 650 Renoult, J. P., A. Kelber, and H. M. Schaefer. 2015. Colour spaces in ecology and  
651 evolutionary biology. *Biol. Rev.*, doi: 10.1111/brv.12230.
- 652 Rojas, B., P. Rautiala, and J. Mappes. 2014. Differential detectability of polymorphic  
653 warning signals under varying light environments. *Behav. Processes* 109:164–  
654 172.
- 655 Secondi, J., and M. Théry. 2014. An ultraviolet signal generates a conflict between sexual  
656 selection and species recognition in a newt. *Behav. Ecol. Sociobiol.* 68:1049–  
657 1058.

- 658 Seehausen, O., Y. Terai, I. S. Magalhaes, K. L. Carleton, H. D. J. Mrosso, R. Miyagi, I.  
659 van der Sluijs, M. V. Schneider, M. E. Maan, H. Tachida, H. Imai, and N. Okada.  
660 2008. Speciation through sensory drive in cichlid fish. *Nature* 455:620–627.
- 661 Steiger, S. S., J. P. Kelley, W. W. Cochran, and M. Wikelski. 2009. Low Metabolism and  
662 Inactive Lifestyle of a Tropical Rain Forest Bird Investigated via Heart-Rate  
663 Telemetry. *Physiol. Biochem. Zool.* 82:580–589.
- 664 Stevens, M., C. A. Párraga, I. C. Cuthill, J. C. Partridge, and T. S. Troscianko. 2007.  
665 Using digital photography to study animal coloration. *Biol. J. Linn. Soc.* 90:211–  
666 237.
- 667 Stevens, M., and G. D. Ruxton. 2012. Linking the evolution and form of warning  
668 coloration in nature. *Proc. R. Soc. B* 279:417–426.
- 669 Stevens, M., M. C. Stoddard, and J. P. Higham. 2009. Studying Primate Color: Towards  
670 Visual System-dependent Methods. *Int. J. Primatol.* 30:893–917.
- 671 Svádová, K., A. Exnerová, P. Štys, E. Landová, J. Valenta, A. Fučíková, and R. Socha.  
672 2009. Role of different colours of aposematic insects in learning, memory and  
673 generalization of naïve bird predators. *Anim. Behav.* 77:327–336.
- 674 Sweeney, A., C. D. Jiggins, and S. Johnsen. 2003. Polarized light as a butterfly mating  
675 signal. *Nature* 423:31–32.
- 676 Swihart, C. A. 1971. Colour discrimination by the butterfly, *Heliconius charitonius* Linn.  
677 *Anim. Behav.* 19:156–164.
- 678 Swihart, S. L. 1972. The neural basis of colour vision in the butterfly, *Heliconius erato*.  
679 *J. Insect Physiol.* 18:1015–1025.
- 680 Taylor, L. a., and K. J. McGraw. 2013. Male ornamental coloration improves courtship  
681 success in a jumping spider, but only in the sun. *Behav. Ecol.* 24:955–967.
- 682 Troscianko, J., and M. Stevens. 2015. Image Calibration and Analysis Toolbox – a free  
683 software suite for objectively measuring reflectance, colour and pattern. *Methods*  
684 *Ecol. Evol.* 6:1320–1331.
- 685 Vorobyev, M., D. Osorio, A. T. D. Bennett, N. J. Marshall, and I. C. Cuthill. 1998.  
686 Tetrachromacy, oil droplets and bird plumage colours. *J. Comp. Physiol. A*  
687 183:621–633.
- 688 Whittle, P. 1994. The psychophysics of contrast brightness. Pp. 35–110 in A. L. Gilchrist,  
689 ed. *Lightness, Brightness, and Transparency*. Lawrence Erlbaum Associates,  
690 Hillsdale, NJ.

691 Zaccardi, G., A. Kelber, M. P. Sison-mangus, and A. D. Briscoe. 2006. Color  
 692 discrimination in the red range with only one long-wavelength sensitive opsin. *J.*  
 693 *Exp. Biol.* 209:1944–1955.

694

695

696

697 **Supplementary Information**

698

699 **Table S1.** Colour contrast differences for avian vision per opponent channel. General linear mixed  
 700 models results using Satterthwaite approximations with random effects and Tukey's post-hoc (y  
 701 ~ Colour + (1 | Individuals) + (1 | Vision:Habitat:Time)).

| Opponent channel | Colour          | N    | Linear mixed model |         |          | Tukey's post-hoc |         |          |
|------------------|-----------------|------|--------------------|---------|----------|------------------|---------|----------|
|                  |                 |      | df                 | t value | p-value  | Contrasts        | z value | p-value  |
| Red-Green        |                 |      |                    |         |          |                  |         |          |
|                  | Red (intercept) | 1176 | 16.3               | 34.59   | < 2E-16  | White - Red      | -18.00  | < 2E-16  |
|                  | White           |      | 1160               | -18.00  | < 2E-16  | Yellow - Red     | -11.10  | < 2E-16  |
|                  | Yellow          |      | 1160               | -11.10  | < 2E-16  | Yellow - White   | 8.26    | 3.33E-16 |
| Blue-Yellow      |                 |      |                    |         |          |                  |         |          |
|                  | Red (intercept) | 1176 | 17.4               | 29.01   | 4.44E-16 | White - Red      | 22.88   | <2E-16   |
|                  | White           |      | 49.3               | 22.88   | < 2E-16  | Yellow - Red     | -11.98  | <2E-16   |
|                  | Yellow          |      | 1140               | -11.98  | < 2E-16  | Yellow - White   | -31.47  | <2E-16   |
| Blue-UV          |                 |      |                    |         |          |                  |         |          |
|                  | Red (intercept) | 1176 | 14.5               | 16.84   | 6.44E-11 | White - Red      | -6.11   | 2.85E-09 |
|                  | White           |      | 1160               | -6.11   | 1.34E-09 | Yellow - Red     | 6.81    | < 1E-09  |
|                  | Yellow          |      | 1160               | 6.80    | 1.57E-11 | Yellow - White   | 12.08   | < 1E-09  |
| Achromatic       |                 |      |                    |         |          |                  |         |          |
|                  | Red (intercept) | 1176 | 36.6               | 16.27   | < 2E-16  | White - Red      | 4.69    | 5.42E-06 |
|                  | White           |      | 28.4               | 4.69    | 6.25E-05 | Yellow - Red     | 41.89   | < 1E-07  |
|                  | Yellow          |      | 1136               | 41.88   | < 2E-16  | Yellow - White   | 12.42   | < 1E-07  |

702

703

704

705

706

707

708

709

710 **Table S2.** Habitat contrast differences for avian vision per colour for the Red-Green opponent  
 711 channel. General linear mixed models results using Satterthwaite approximations with random  
 712 effects and Tukey's post-hoc ( $y \sim \text{Habitat} + (1 | \text{Individuals}) + (1 | \text{Vision:Time})$ ).

| Colour | Habitat            | N   | Linear mixed model |         |          | Tukey's post-hoc |         |         |
|--------|--------------------|-----|--------------------|---------|----------|------------------|---------|---------|
|        |                    |     | df                 | t value | p-value  | Contrasts        | z value | p-value |
| Red    | Border (intercept) | 448 | 445                | 33.05   | <2E-16   | Forest - Border  | -0.31   | 0.947   |
|        | Forest             |     | 445                | -0.31   | 0.755    | Open - Border    | 7.55    | <1E-05  |
|        | Open               |     | 445                | 7.54    | 2.54E-13 | Open - Forest    | 7.77    | <1E-05  |
| Yellow | Border (intercept) | 448 | 9.2                | 53.37   | 7.90E-13 | Forest - Border  | 10.77   | <2E-16  |
|        | Forest             |     | 425                | 10.77   | <2E-16   | Open - Border    | 21.46   | <2E-16  |
|        | Open               |     | 429.2              | 21.46   | <2E-16   | Open - Forest    | 14.63   | <2E-16  |
| White  | Border (intercept) | 280 | 9.05               | 24.88   | 1.21E-09 | Forest - Border  | -3.14   | 0.005   |
|        | Forest             |     | 262.9              | -3.14   | 0.002    | Open - Border    | 16.84   | < 1E-04 |
|        | Open               |     | 265.3              | 16.84   | <2E-16   | Open - Forest    | 18.83   | < 1E-04 |

713

714

715

716 **Table S3.** Time contrast differences for avian vision per colour for the Blue-Yellow opponent  
 717 channel. General linear mixed models results using Satterthwaite approximations with random  
 718 effects and Tukey's post-hoc ( $y \sim \text{Time} + (1 | \text{Individuals}) + (1 | \text{Vision:Habitat})$ ).

| Colour | Time             | N   | Linear mixed model |         |          | Tukey's post-hoc |         |          |
|--------|------------------|-----|--------------------|---------|----------|------------------|---------|----------|
|        |                  |     | df                 | t value | p-value  | Contrasts        | z value | p-value  |
| Red    | 12PM (intercept) | 448 | 9.4                | 17.31   | 2.03E-08 | 7AM - 12PM       | 4.44    | 2.37E-05 |
|        | 7AM              |     | 367.3              | 4.44    | 1.18E-05 | 9AM - 12PM       | 4.17    | 8.14E-05 |
|        | 9AM              |     | 367.3              | 4.17    | 3.73E-05 | 9AM - 7AM        | -0.25   | 0.964    |
| Yellow | 12PM (intercept) | 448 | 5.7                | 14.04   | 1.15E-05 | 7AM - 12PM       | 12.15   | <1E-04   |
|        | 7AM              |     | 436.6              | 12.15   | 2.00E-16 | 9AM - 12PM       | 14.24   | <1E-04   |
|        | 9AM              |     | 436.6              | 14.24   | 2.00E-16 | 9AM - 7AM        | 2.07    | 0.0969   |
| White  | 12PM (intercept) | 280 | 5.1                | 25.46   | 1.41E-06 | 7AM - 12PM       | -1.59   | 0.250    |
|        | 7AM              |     | 250.1              | -1.58   | 0.113    | 9AM - 12PM       | -0.08   | 0.996    |
|        | 9AM              |     | 250.1              | -0.08   | 0.936    | 9AM - 7AM        | 1.46    | 0.306    |

719

720

721 **Table S4.** Habitat contrast differences for avian vision for the achromatic opponent channel per  
 722 colour. General linear mixed models results using Satterthwaite approximations with random  
 723 effects and Tukey's post-hoc ( $y \sim \text{Habitat} + (1 | \text{Individuals}) + (1 | \text{Vision:Time})$ ).

| Colour | Habitat            | N   | Linear mixed model |         |          | Tukey's post-hoc |         |         |
|--------|--------------------|-----|--------------------|---------|----------|------------------|---------|---------|
|        |                    |     | df                 | t value | p-value  | Contrasts        | z value | p-value |
| Red    | Border (intercept) | 448 | 12.5               | 22.28   | 2.00E-11 | Forest - Border  | -3.50   | 0.001   |
|        | Forest             |     | 425                | -3.51   | 0.001    | Open - Border    | -7.52   | < 1E-04 |
|        | Open               |     | 429.8              | -7.52   | 3.19E-13 | Open - Forest    | -5.30   | < 1E-04 |
| Yellow | Border (intercept) | 448 | 14.4               | 24.45   | 3.89E-13 | Forest - Border  | -3.42   | 0.002   |
|        | Forest             |     | 424.8              | -3.42   | 0.001    | Open - Border    | -5.56   | < 1E-04 |
|        | Open               |     | 376.1              | -5.56   | 5.07E-08 | Open - Forest    | -3.34   | 0.002   |
| White  | Border (intercept) | 280 | 13.9               | 21.02   | 5.89E-12 | Forest - Border  | -2.41   | 0.041   |
|        | Forest             |     | 263                | -2.41   | 0.017    | Open - Border    | -0.02   | 1.000   |
|        | Open               |     | 267.7              | -0.02   | 0.981    | Open - Forest    | 1.51    | 0.280   |

724

725

726

727

728

729

730

731

732

733

734

735

736

737

738

739

740

741

742

743

744



745 **Table S5.** Habitat contrast differences for *Heliconius* vision for yellow and white colours, per  
 746 opponent channel and time. General linear mixed models results using Satterthwaite  
 747 approximations with random effects and Tukey's post-hoc ( $y \sim \text{Habitat} + (1 | \text{Individuals}) + (1 |$   
 748  $\text{Side})$ ).

| Colour | Channel | Time     | Habitat            | N                  | Linear mixed model |         |          | Tukey's post-hoc |         |          |  |
|--------|---------|----------|--------------------|--------------------|--------------------|---------|----------|------------------|---------|----------|--|
|        |         |          |                    |                    | df                 | t value | p-value  | Contrasts        | z value | p-value  |  |
| Yellow | UV2-UV1 | 7AM      | Border (intercept) | 64                 | 1                  | 7.41    | 0.081    |                  |         |          |  |
|        |         |          | Forest             |                    | 46                 | -23.1   | <2e-16   |                  |         |          |  |
|        |         |          |                    |                    |                    |         |          |                  |         |          |  |
|        |         | 9AM      | Border (intercept) | 64                 | 1                  | 6.56    | 0.090    |                  |         |          |  |
|        |         |          | Forest             |                    | 61                 | -13.31  | <2e-16   |                  |         |          |  |
|        |         |          |                    |                    |                    |         |          |                  |         |          |  |
|        |         | 12PM     | Border (intercept) | 96                 | 1                  | 4.28    | 0.124    | Forest - Border  | 2.20    | 0.071    |  |
|        |         |          | Forest             |                    | 92                 | 2.20    | 0.03     | Open - Border    | 7.49    | 0.001    |  |
|        |         |          | Open               |                    | 92                 | 7.49    | 4.02E-11 | Open - Forest    | 5.29    | 0.001    |  |
| White  | UV2-UV1 | 7AM      | Border (intercept) | 40                 | 11.4               | 6.57    | 3.37E-05 |                  |         |          |  |
|        |         |          | Forest             |                    | 29                 | 2.62    | 0.014    |                  |         |          |  |
|        |         |          |                    |                    |                    |         |          |                  |         |          |  |
|        |         | Blue-UV2 | 7AM                | Border (intercept) | 40                 | 13.3    | 4.52     | 0.001            |         |          |  |
|        |         |          |                    | Forest             |                    | 29      | 6.12     | 1.14E-06         |         |          |  |
|        |         |          |                    |                    |                    |         |          |                  |         |          |  |
|        |         | 12AM     | Border (intercept) | 60                 | 21.6               | 13.1    | 9.32E-12 | Forest - Border  | -4.11   | 1.24E-04 |  |
|        |         |          | Forest             |                    | 48                 | -4.11   | 1.54E-04 | Open - Border    | -3.43   | 0.002    |  |
|        |         |          | Open               |                    | 48                 | -3.43   | 0.001    | Open - Forest    | 0.67    | 0.776    |  |

749  
 750  
 751  
 752  
 753  
 754  
 755  
 756  
 757  
 758  
 759  
 760  
 761  
 762  
 763  
 764  
 765



766 **Table S6.** Side of the wing contrast differences for *Heliconius* vision for the red colour, per  
 767 opponent channel. General linear mixed models results using Satterthwaite approximations with  
 768 random effects and Tukey's post-hoc ( $y \sim \text{Side} + (1 \mid \text{Individuals}) + (1 \mid \text{Habitat:Time})$ ).

| Opponent Channel | Side of the wing   | N   | Linear mixed model |         |          |
|------------------|--------------------|-----|--------------------|---------|----------|
|                  |                    |     | df                 | t value | p-value  |
| Red-Green        |                    |     |                    |         |          |
|                  | Dorsal (intercept) | 224 | 6.2                | 9.78    | 5.59E-05 |
|                  | Ventral            |     | 201                | -40.04  | < 2E-16  |
| Blue-Yellow      |                    |     |                    |         |          |
|                  | Dorsal (intercept) | 224 | 7.3                | 22.24   | 5.63E-08 |
|                  | Ventral            |     | 201                | -25.5   | < 2E-16  |
| Blue-UV2         |                    |     |                    |         |          |
|                  | Dorsal (intercept) | 224 | 16.6               | 36.51   | < 2E-16  |
|                  | Ventral            |     | 201                | -34.61  | < 2E-16  |
| UV2-UV1          |                    |     |                    |         |          |
|                  | Dorsal (intercept) | 224 | 8                  | 17.89   | 8.76E-08 |
|                  | Ventral            |     | 216                | 2.84    | 0.0048   |

769
